# Supplementary figures and images for: Screening of Lactiplantibacillus plantarum Strains from Sourdoughs for Biosuppression of Pseudomonas syringae pv. syringae and Botrytis cinerea in Table Grapes
Source: MDPI journal article supplement (doi:10.3390/microorganisms10112094), 2022-10-22

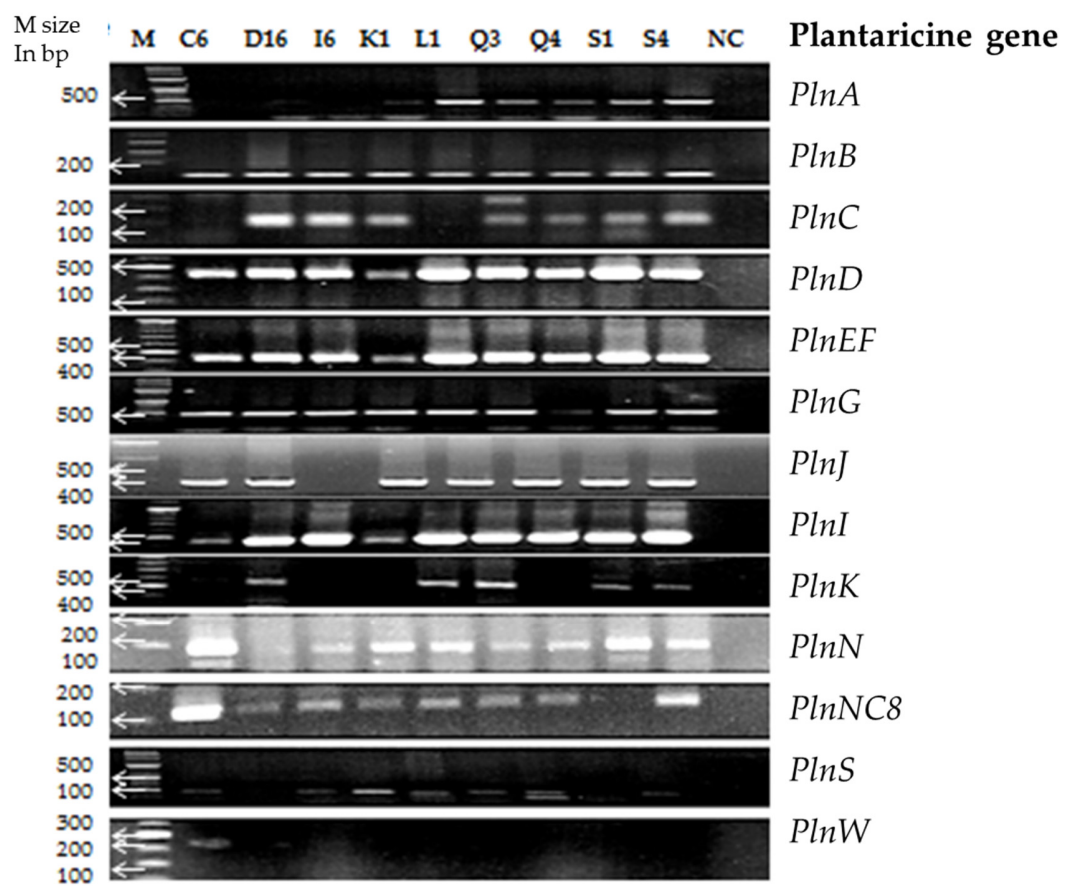

**Figure S1.** Plantaricin synthesis genes identified in LAB isolates.

Supplement: s1 [file s1]
